# Supplementary material for: Efficient Diode Performance with Improved Effective Carrier Lifetime and Absorption Using Bismuth Nanoparticles Passivated Silicon Nanowires
Source: MDPI journal article supplement (doi:10.3390/nano12213729), 2022-10-24
Supplement: s1 [file s1]

# Supplementary Materials

Article

## Efficient Diode Performance with Improved Effective Carrier Lifetime and Absorption using Bismuth Nanoparticles Passivated Silicon Nanowires

Mariam Naffeti <sup>1,2,3, \*</sup>, Mohamed Ali Zaïbi <sup>1,3</sup>, Alejandro Vidal García-Arias <sup>2</sup>, Radhouane Chtourou <sup>1</sup> and Pablo Aitor Postigo <sup>2,4</sup>

<sup>1</sup> Laboratory of Nanomaterials and Systems for Renewable Energies (LaNSER), Research and Technology Center of Energy, Techno-Park Borj-Cedria, Bp 95, 2050 Hammam-Lif, Tunis, Tunisia

<sup>2</sup> Instituto de Micro y Nanotecnología, IMN-CNM, CSIC (CEI UAM+CSIC) Isaac Newton, 8, E-28760 Tres Cantos, Madrid, Spain

<sup>3</sup> Tunis University — The Higher National Engineering School of Tunis, 5 Av Taha Hussein 1008 Tunis, Tunisia

<sup>4</sup> The Institute of Optics, University of Rochester, Rochester, New York 14627, USA

\* Correspondence: naffeti.mariam@gmail.com

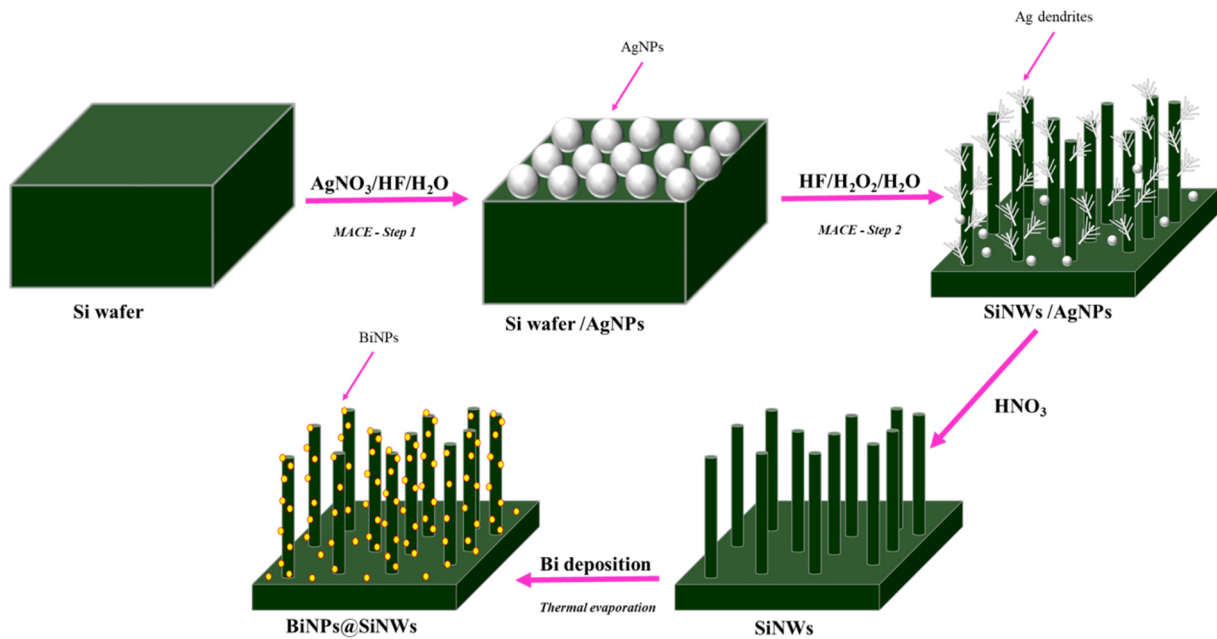

**Figure S1.** Schematic illustration for the fabrication of BiNPs@SiNWs nanocomposite

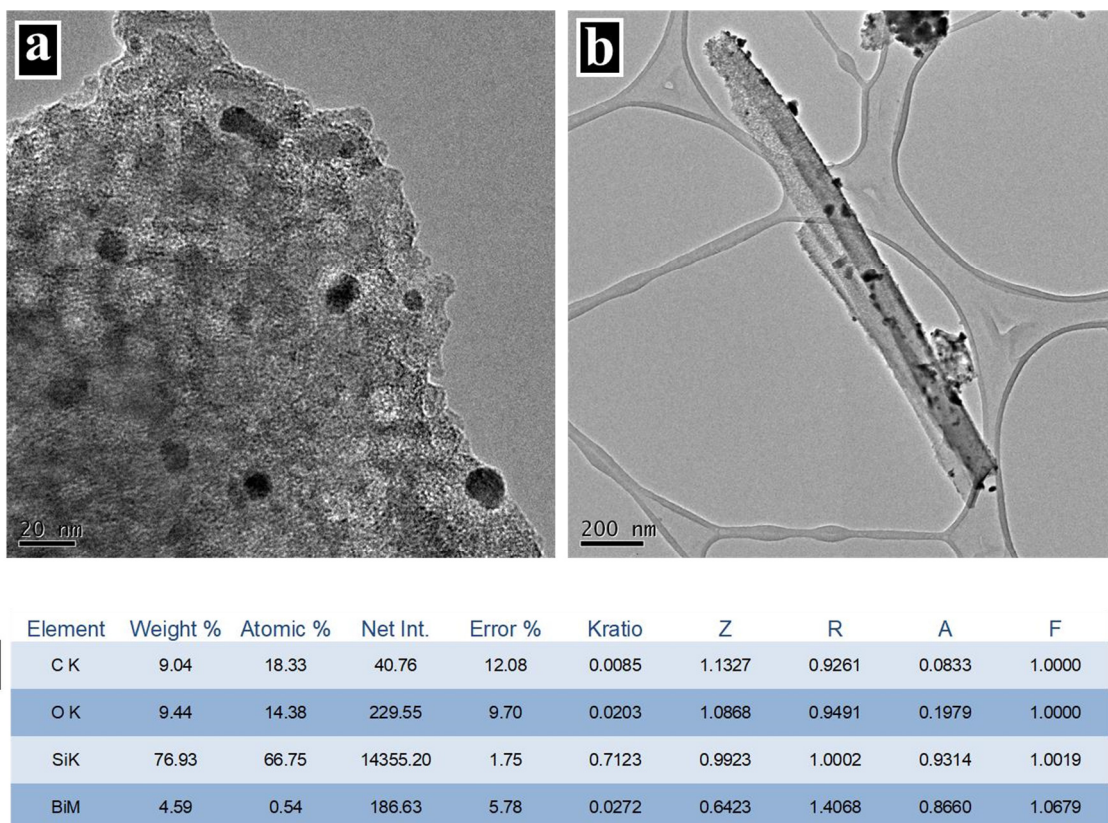

**Figure S2. (a,b)** TEM images of Bi-rich SiNWs sample and **(c)** corresponding EDX table of the elemental concentration

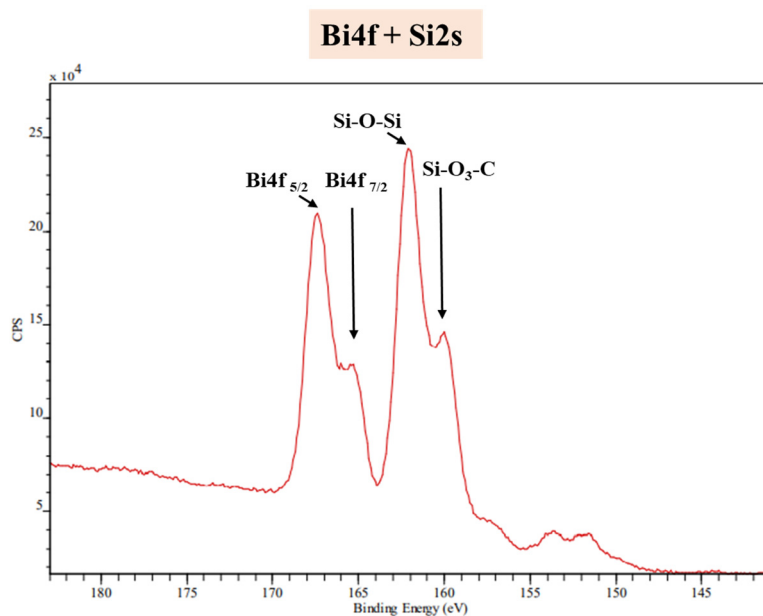

**Figure S3. Deconvolution of Bi4f and Si2s XPS peaks**

**Table S1.** Comparison of Bi@SiNWs diode performance with other modified-SiNWs devices of various works

| Devices          | SiNWs formation technique | Material deposition technique | $\eta$ determination technique         | $\eta$       | references |
|------------------|---------------------------|-------------------------------|----------------------------------------|--------------|------------|
| Pt@SiNWs         | MACE                      | Electroless deposition        | conventional TE                        | 9.61         | [19]       |
| Ag@SiNWs         | MACE                      | Electroless deposition        | conventional TE                        | 7.78         | [19]       |
| Graphene@SiNWs   | MACE                      | PECVD                         | conventional TE                        | 3.92 ~ 5.52  | [39]       |
| Ag@SiNWs/polymer | MACE                      | Electroless deposition        | conventional TE                        | 2.16 ~ 2.41  | [40]       |
| Pt@SiNWs         | MACE                      | Placing Pt Tip (monocontact)  | conventional TE                        | 3.7          | [41]       |
| Polymer@SiNWs    | MACE                      | Spin coating                  | conventional TE                        | 7.8          | [42]       |
| Bi@SiNWs         | MACE                      | Thermal evaporation           | conventional TE → Cheung's functions → | 1.88<br>1.96 | This work  |
